# Supplementary material
Source: ML conference proceedings conference paper supplement (https://proceedings.neurips.cc/paper_files/paper/2019/hash/42a6845a557bef704ad8ac9cb4461d43-Abstract.html)
Supplement: Supplementary file 3 [file 42a6845a557bef704ad8ac9cb4461d43-Supplemental.zip]

Archive with 4 entries (3 files):
- supplement_updated.pdf
- __MACOSX/
- __MACOSX/._supplement_updated.pdf
- code.zip
